# Supplementary material
Source: PubMed Central journal article supplement (PMC9794822)
Supplement: 41423_2022_959_MOESM1_ESM.pdf [file 41423_2022_959_MOESM1_ESM.pdf]

## **Supplementary Information**

### **RANKL-responsive epigenetic mechanism reprograms macrophage to bone resorbing osteoclasts**

Seyeon Bae, Kibyeong Kim, Keunsoo Kang, Heamin Kim, Minjoon Lee, Brian Oh, Kaichi Kaneko, Sungkook Ma, Jae Hoon Choi, Hojoong Kwak, Eun Young Lee, Sung Ho Park, and Kyung-Hyun Park-Min

|                                                     |            |
|-----------------------------------------------------|------------|
| <b>Supplementary figure legend</b>                  | <b>2</b>   |
| <b>Supplementary figures 1-5</b>                    | <b>3-7</b> |
| <b>Supplementary Table 1</b>                        | <b>8</b>   |
| <b>Appendix; List of acronyms and abbreviations</b> | <b>9</b>   |

## Online supplementary figure legend

### Online supplementary figure 1. Mapping of RANKL-sensitive SEs in human osteoclasts.

(a) Table showing the correlation between biological replicates for H3K27ac, Pol II ChIP-seq, ATAC-seq experiments. The Pearson correlation coefficient was estimated based on the average read densities in 4kb regions around the TSS of RefSeq. (b) Gene ontology for down-regulated SEs with corresponding adjusted p-value.

**Online supplementary figure 2. Cell-type specific SEs in osteoblast and CD4+ T cell.** Gene ontology for osteoblast-specific (a) and CD4+ T cell-specific (b) SEs with corresponding adjusted p-value.

**Online supplementary figure 3. Transcription Factors at RANKL-sensitive SEs.** (a) mRNA expression of NFATc1, PPARGC1B, and ITGAV obtained from publicly available data SRP047069. (b) Overall sequencing coverage of H3K27ac and ATAC-seq around Fos and NF- $\kappa$ B binding motifs. Dotted line, dashed line, and solid lines represent coverage around motifs genome-wide, motifs within TEs, and motifs within SEs, respectively. The black line represents the control group (CTRL) and the red line represents the RANKL-treated group. The solid line represents super-enhancer and the dotted line represents typical enhancer (TE). (c) Human BATF1 or 3 expressions are measured by real time-qPCR. Cells were cultured with RANKL for the indicated times. \*:  $p < 0.05$ , \*\*:  $p < 0.01$ , \*\*\*:  $p < 0.001$ , n.s.: not significant by Student's *t*-test (a) or one way ANOVA with *post-tukey* test (c).

**Online supplementary figure 4. RANKL-induced SE-eRNA expression in human osteoclasts.** Representative tracks of pro-seq (upper tracks) and RNA-seq (bottom tracks, RA: RA synovial OCPs, CTRL: disease control) at PRDM-associated (a), MYC-associated (b) SE domain in the indicated conditions. Up-regulated dREG peaks of pro-seq (brown) are shown.

**Online supplementary figure 5. The role of SE-eRNA:NFATc1 in human osteoclasts.** The expression of SE-eRNA:NFATc1 was knocked down by electroporation with ASO-LNA in human OCPs. Cells were subsequently cultured with M-CSF (20ng/ml) and RANKL (40ng/ml),  $n=4$ . (a) The expression of SE-eRNA:NFATc1 was measured by RT-qPCR in the indicated conditions after RANKL stimulation for 24 h. (b) Osteoclastogenesis assay. Left panel shows representative images of TRAP-stained cells. Right panel shows the percentage of TRAP-positive multinuclear cells (MNCs: more than three nuclei) per control. Scale bar: 200  $\mu$ m. (c) NFATc1 mRNA were measured by RT-qPCR in the indicated conditions after RANKL stimulation for 24 h. (d) Immunoblot analysis of NFATc1 expression in the indicated conditions after RANKL stimulation for 24 h.  $\alpha$ -tubulin served as a loading control. Representative results from three donors are shown. (e) SE-eRNA:NFATc1 was measured using real-time PCR in presence or absence of I-BET151 (500 nM) after RANKL stimulation for 24 h. (f) Representative tracks for nuclear seq of RA synovial CD14+ cells in vicinity of PRDM1 and MYC (RA: RA synovial OCPs, CTRL: disease control). \*:  $p < 0.05$ , \*\* $p < 0.01$ , \*\*\*:  $p < 0.001$ , \*\*\*\*:  $p < 0.0001$  by one way ANOVA with *post-tukey* test (a,c,e) or by Student's *t*-test (b).

**a**

|                 |                 |                 |              |
|-----------------|-----------------|-----------------|--------------|
|                 | H3K27ac_CTRL_1  | H3K27ac_CTRL_2  |              |
| H3K27ac_CTRL_1  | 1               | 0.9492          |              |
| H3K27ac_CTRL_2  | 0.9492          | 1               |              |
|                 | H3K27ac_RANKL_1 | H3K27ac_RANKL_2 |              |
| H3K27ac_RANKL_1 | 1               | 0.9134          |              |
| H3K27ac_RANKL_2 | 0.9134          | 1               |              |
|                 | ATAC_CTRL_1     | ATAC_CTRL_2     | ATAC_CTRL_3  |
| ATAC_CTRL_1     | 1               | 0.9994          | 0.9964       |
| ATAC_CTRL_2     | 0.9994          | 1               | 0.9981       |
| ATAC_CTRL_3     | 0.9964          | 0.9981          | 1            |
|                 | ATAC_RANKL_1    | ATAC_RANKL_2    | ATAC_RANKL_3 |
| ATAC_RANKL_1    | 1               | 0.998           | 0.9978       |
| ATAC_RANKL_2    | 0.998           | 1               | 0.9935       |
| ATAC_RANKL_3    | 0.9978          | 0.9935          | 1            |
|                 | PoIII_CTRL_1    | PoIII_CTRL_2    |              |
| PoIII_CTRL_1    | 1               | 0.8165          |              |
| PoIII_CTRL_2    | 0.8165          | 1               |              |
|                 | PoIII_RANKL_1   | PoIII_RANKL_2   |              |
| PoIII_RANKL_1   | 1               | 0.8012          |              |
| PoIII_RANKL_2   | 0.8012          | 1               |              |

**b**

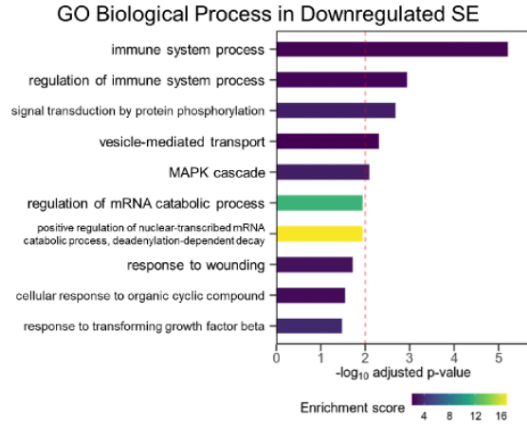

Supplementary figure 1

**a**

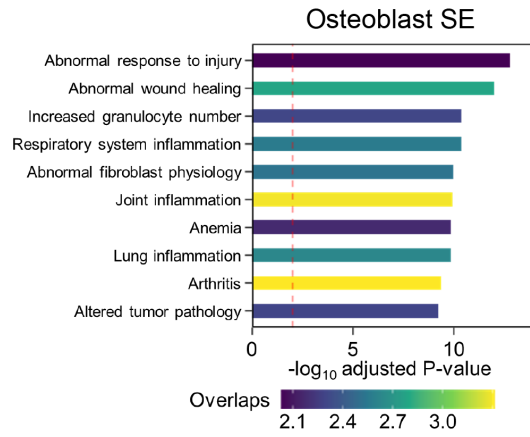

**b**

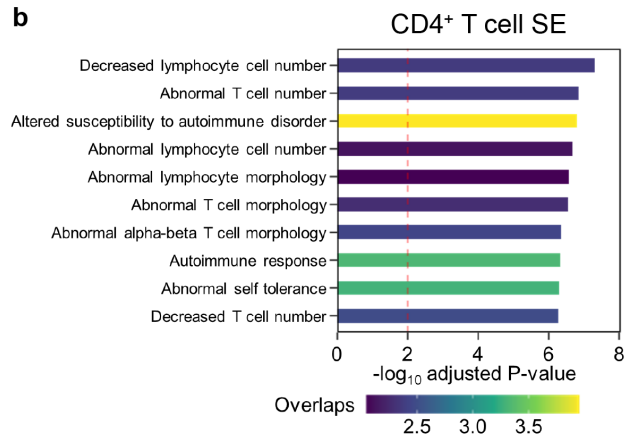

Supplementary figure 2

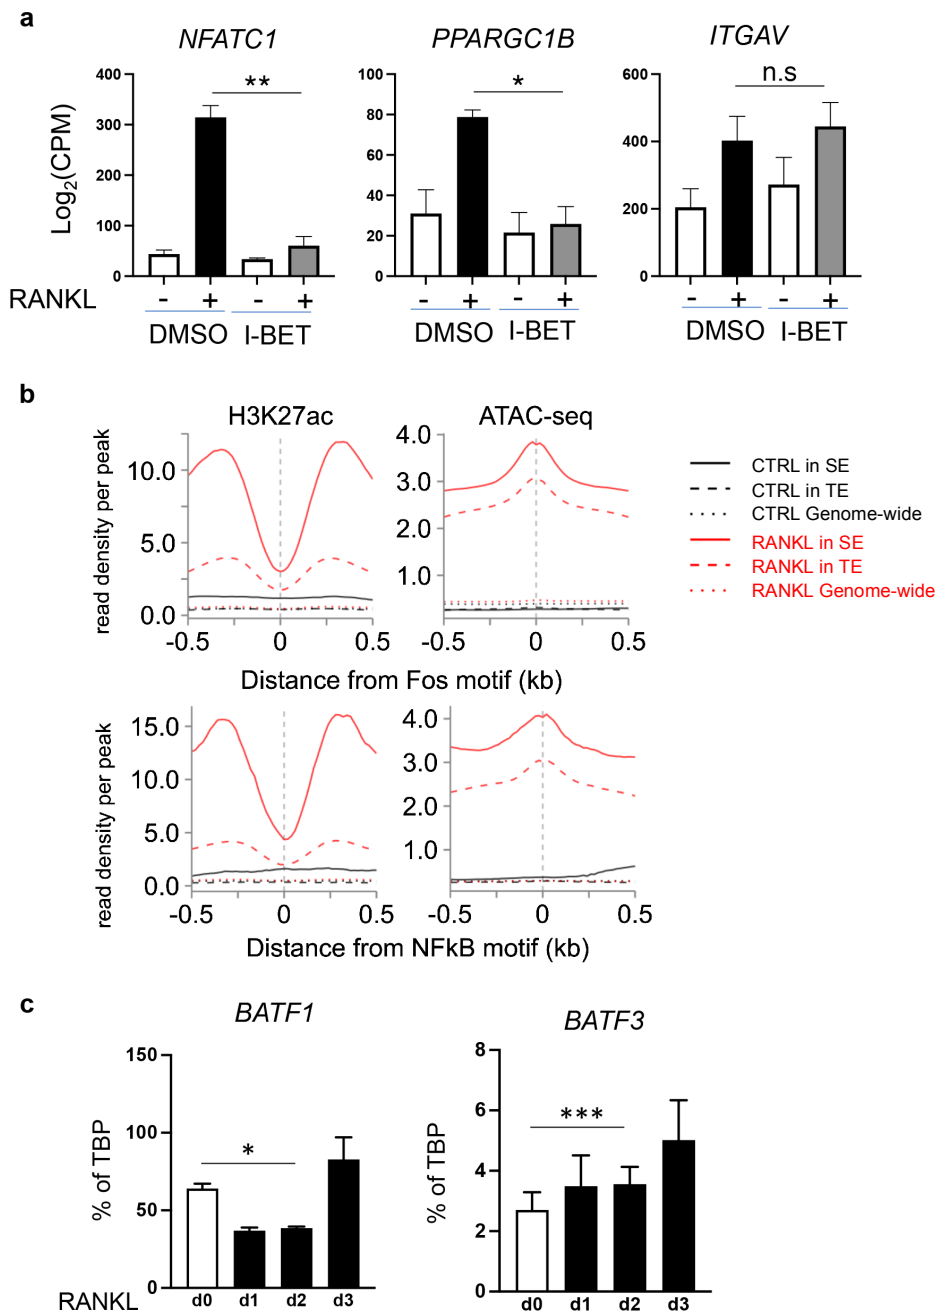

Supplementary figure 3

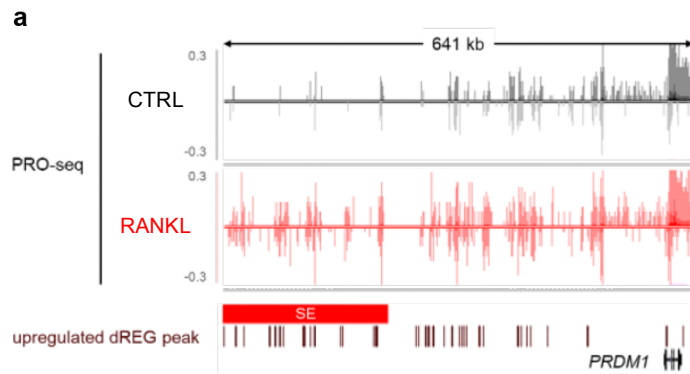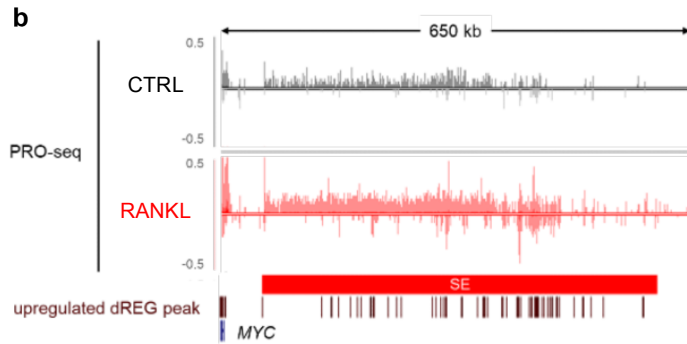

Supplementary figure 4

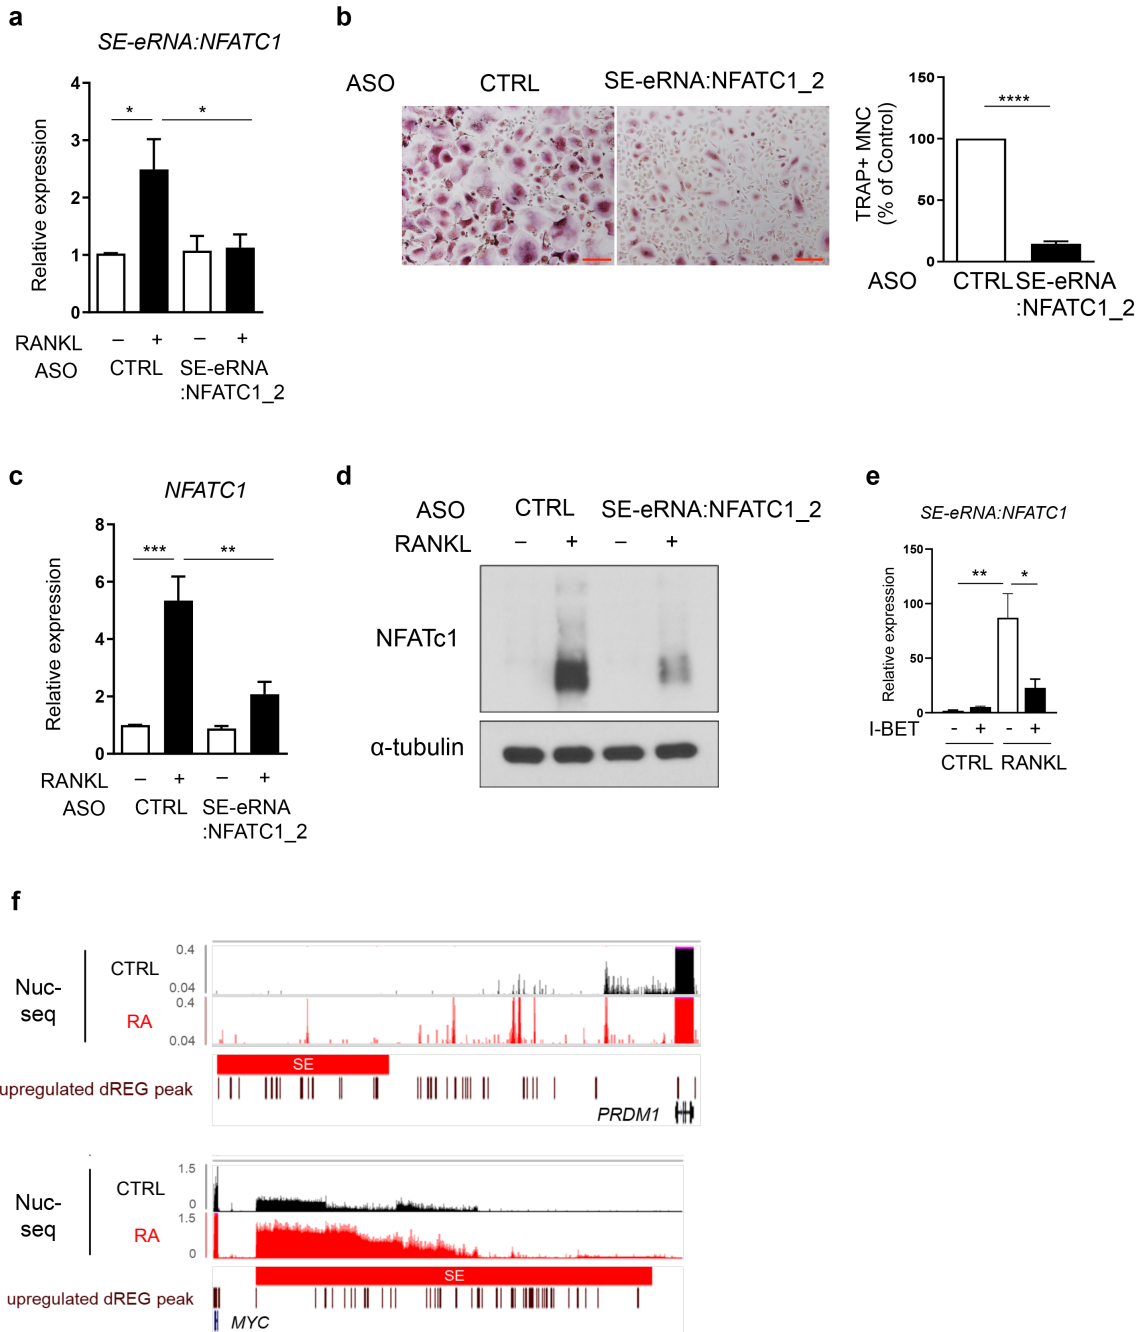

Supplementary figure 5

**Supplementary Table 1. A list of primers used in this study.**

| Gene Symbol    | Sequence                                         |
|----------------|--------------------------------------------------|
| Human TBP      | CACCACAGCTCTTCCACTA<br>GGGGAGGGATACAGTGGAGT      |
| Human NFATc1   | CTTCTTCCAGTATTCCACCTAT<br>TTGCCCTAATTACCTGTTGAAG |
| SE-eRNA:NFATc1 | CAATCCCATGAAACAAACGCTCA<br>CCAGGCCCTTCGCGATT     |
| Human BATF1    | AAATCGTATTGCCGCCAG<br>TAGAGCCGCGTTCTGTTTCT       |
| Human BATF3    | ATGAGAGCCTGGAGCAAGAA<br>TTCAGTGCCTCTGTCAGGTG     |



## Appendix; A list of acronyms and abbreviations

|                       |                                                                     |
|-----------------------|---------------------------------------------------------------------|
| <b>AP-1</b>           | Activator protein-1                                                 |
| <b>ASO-LNA</b>        | Antisense oligonucleotides                                          |
| <b>ATAC-seq</b>       | Transposase-Accessible Chromatin with high-throughput sequencing    |
| <b>ATF3</b>           | Activating Transcription Factor 3                                   |
| <b>BATF</b>           | Basic Leucine Zipper ATF-Like Transcription Factor                  |
| <b>BET</b>            | Bromodomain and extraterminal                                       |
| <b>BRD4</b>           | Bromodomain-containing protein 4                                    |
| <b>CAGE</b>           | Cap-analysis of gene expression                                     |
| <b>ChIP-seq</b>       | Chromatin immunoprecipitation (ChIP)-sequencing                     |
| <b>Dnmt3a</b>         | DNA methyltransferase 3a                                            |
| <b>dREG</b>           | Regulatory-element detection from gro-seq                           |
| <b>eRNA</b>           | Enhancer RNA                                                        |
| <b>Elf4</b>           | E74 Like ETS Transcription Factor 4                                 |
| <b>FBS</b>            | Fetal bovine serum                                                  |
| <b>Fra1</b>           | Fos-related antigen 1                                               |
| <b>H3K27ac</b>        | Histone 3 acetylation at lysine 27                                  |
| <b>H3K4me1</b>        | Histone 3 mono-methylation at lysine 4                              |
| <b>IRF8</b>           | Interferon Regulatory Factor 8                                      |
| <b>ITGAV</b>          | Integrin Subunit Alpha V                                            |
| <b>KLF2</b>           | Kruppel Like Factor 2                                               |
| <b>MAFA</b>           | MAF BZIP Transcription Factor A                                     |
| <b>MCSF</b>           | Macrophage colony stimulating factor                                |
| <b>MMP9</b>           | Matrix metalloproteinase-9                                          |
| <b>NFATc1</b>         | Nuclear factor of activated T cells, c1                             |
| <b>Nuc-seq</b>        | Nuclear RNA sequencing                                              |
| <b>OVX</b>            | Ovariectomy                                                         |
| <b>PBMC</b>           | Peripheral blood mononuclear cells                                  |
| <b>PoI II</b>         | RNA polymerase II                                                   |
| <b>POSTN</b>          | Periostin                                                           |
| <b>PPARGC1B</b>       | Peroxisome proliferator-activated receptor gamma coactivator 1-beta |
| <b>PRDM1</b>          | PR/SET Domain 1                                                     |
| <b>Pro-seq</b>        | Precision nuclear run-on and sequencing                             |
| <b>RA</b>             | Rheumatoid arthritis                                                |
| <b>RANKL</b>          | Receptor activator of NF- $\kappa$ B ligand                         |
| <b>ROSE algorithm</b> | The rank ordering of super-enhancer algorithm                       |
| <b>RUNX2</b>          | Runt-related transcription factor 2                                 |
| <b>SAM</b>            | S-adenosylmethionine                                                |
| <b>SE</b>             | Super-enhancer                                                      |
| <b>SE-eRNA</b>        | Super-enhancer-associated enhancer RNA                              |
| <b>SF</b>             | Human synovial fluid                                                |
| <b>siRNAs</b>         | Small interfering RNAs                                              |
| <b>TE</b>             | Typical enhancers                                                   |
| <b>TF</b>             | Transcription factors                                               |
| <b>TNFRSF1B</b>       | TNF receptor superfamily member 1B                                  |
| <b>TRAP</b>           | Tartrate-resistant acid phosphatase                                 |
